# Supplementary material for: Process evaluation of school-based high-intensity interval training interventions for children and adolescents: a systematic review and meta-analysis of randomized controlled trials
Source: BMC Public Health. 2024 Feb 2;24:348. doi: 10.1186/s12889-024-17786-6 (PMC10835840; doi:10.1186/s12889-024-17786-6)
Supplement: Supplementary file 6 — Additional file 6. [file 12889_2024_17786_MOESM6_ESM.xlsx]

## Sheet: RoB for CRF (cluster)
Basic information													Domain 1a. Randomization process										Domain 1b: Risk of bias arising from the timing of identification or recruitment of participants											Domain 2. Deviations from intended interventions
Time	Unique ID	Assessor	Study ID	Reference	Experimental	Comparator	Outcome	Results	Aim	Effect of adhering to intervention?	Weight	Sources	1a.1	1a.2	Note for 1a.1&1a.2	1a.3	Note for 1a.3	1a.0 Algorithm result	1a.0 Assessor's Judgement	1a.0 General note	1a.0 Optional Question	1a.0 Note for optional question	1b.1	Note for 1b.1	1b.2	Note for 1b.2	1b.3	Note for 1b.3	1b.0 Algorithm result	1b.0 Assessor's Judgement	1b.0 General note	1b.0 Optional Question	1b.0 Note for optional question	2.1a	Note for 2.1a	2.1b (2.1)	2.2	Note for 2.1b&2.2	2.3	Note for 2.3	2.4	Note for 2.4	2.5	Note for 2.5	2.6	Note for 2.6	2.7	Note for 2.7	2.0 Algorithm result
2022/10/02 21.58	Williams 2000	YONG			HIIT	wait-list control	CRF	VO2peak	assignment to intervention (the 'intention-to-treat' effect)	NA	1	Journal article(s)	Y	NI	The schools were then randomly assigned to one of three groups. However, no further information provided.	N	three group: 12, 13 and 14 participants.	Some concerns	Some concerns	Only said schools were randomly allocated, no further informaiton of how. There were no baseline imbalance			Y	Randomisation was taken place after they visited the lab.	NA		N	No baseline imbalances.	Low	Low				Y	They were dilivered to lab three times, so yes.	PY	PY	Participants and carers in the intervention group might aware their assignment of intervention as they doing the SIT.	PN	No deviations arose because of the context.	NA		NA		Y	repeated measures analysis of variance was used.	NA		Low
2022/10/03 16.29	Lubans 2020	YONG			HIIT	wait-list control	CRF	20m shuttle run	assignment to intervention (the 'intention-to-treat' effect)	NA	1	Journal article(s); Trial protocol	Y	Y	Paired schools (within cohorts) were randomised by an independent researcher using a computer-based random number generator.	N	both control and intervention are 10 schools, with 333 and 337 participants in control and intervention groups, respectively (see figure 1).	Low	Low				Y	Randomisation took place after baseline measurement.	NA		N	No imbalances exist at baseline (table 2).	Low	Low				PY	Did not mention, but most probably yes.	NI	PY	as they doing extra exercises during academic classes, both students and deliverers (teacher) might aware that they are in the trial.	PN	No evidence show the intervention effect will be changed due to the trial context.	NA		NA		Y	linear mixed model was used.	NA		Low
2022/12/08 15.09	McNarry 2021	YONG			HIIT	wait-list control	CRF	VO2peak	assignment to intervention (the 'intention-to-treat' effect)	NA	1	Journal article(s)	Y	NI	Cluster randomization was used to select 1 intervention and 4 control schools in South Wales. no information regarding if allocation sequence concealed.	PN	intervention and control number was unbalanced, but seems they intended to so.	Some concerns	Some concerns				PY	They were selected before randomised as they are from a bigger study.	NA		PN	No baseline difference on VO2peak	Low	Low				PY	They were selected and doing different exercises.	PY	PY	they might know they are in the intervention group and no information regarding blinding.	PN	No evidence of deviations based on the context.	NA		NA		PY	mixed linear regression models was used which is considered to taking the missing data into account.	NA		Low
2022/10/13 17.31	Harris 2021	YONG			HIIT	wait list control	CRF	20 m shuttle run	assignment to intervention (the 'intention-to-treat' effect)	NA	1	Journal article(s)	Y	Y	After baseline testing, one classwithin each school was randomized via blank envelope selection to either the intervention or control, by class group.	PN	No significant difference between intervention and control group regarding baseline CRF.	Low	Low				Y	Randomisation commenced after baseline measurement.	NA		PN	No evidence of baseline imbalance.	Low	Low				PY	with the measurement and the exercise training, they might know they are in a trail.	PY	PY	Both deliverers and participants might know they were assigned to intervention as they are doing the exercises.	PN	No evidence of deviation due to the context.	NA		NA		PY	Intention-to-treat ananlysis was adopted in the study.	NA		Low
2022/10/17 10.55	Takehara 2021	YONG			HIIT	wait list control	CRF	20 m shuttle run	assignment to intervention (the 'intention-to-treat' effect)	NA	1	Journal article(s); Trial protocol	Y	Y	Using computer-generated random numbers, also stratified residential area.	PN	1143 and 1148 for intervention and control groups	Low	Low				Y	Randomisation after recruitment and stratified into Urban and mixed residential area.	NA		N	No baseline imbalances identified.	Low	Low				PY	There are participants in the control and intervention group at the same school. They may aware they are in a trial as they did the intervention	PY	PY	Both participants and deliverers may aware the assignment of a intervention group as they are doing different exercise and the intervention is delivered by researchers.	PN	No signs of deviation because of the context.	NA		NA		Y	They adopted the intensiton to treat method	NA		Low
2022/10/25 10.40	Wassenaar 2021	YONG			HIIT	wait list control	CRF	20 m shuttle run	assignment to intervention (the 'intention-to-treat' effect)	NA	1	Journal article(s); Trial protocol	Y	Y	Schools were randomised with 1:1 ratio by stratified block randomisation. The random number generated in Stata.	PN	No evidence of baseline imblance.	Low	Low				Y	Schools recruited first before randomisation.	NA		PN	No evidence of baseline imblance.	Low	Low				PY	They know they were in a trial.	PN	PY	According to the article, participants were not told if they are in a control or intervention group, however, the deliverer did.	PN	No evidence of deviation due to the context.	NA		NA		Y	an intention-to-treat analysis were conducted to account for the group allocation.	NA		Low
2022/10/26 16.43	Vizcaino 2021	YONG			HIIT	wait list control	CRF	20 m shuttle run	assignment to intervention (the 'intention-to-treat' effect)	NA	1	Journal article(s); Trial protocol	PY	PY	only statement that the intervention is a cluster-randomisation study, no further information. However, they use 'exploration of outlier values was performed to_x000D_ assess the effectiveness of the randomization processes'.	PN	no baseline differences suggest problem with teh randomisation process.	Low	Low				PY	see figure 1, randomisation happened after recruitment.	NA		PN	No baseline imbalances identified. see table 1.	Low	Low				PY	Paticipants probably know they are in a trial as they doing additional exercises.	PY	PY	Although this is a randomized controlled trial, children, parents, and teachers could not be blinded regarding the allocation group and some bias could be derived from this fact (cited from the protocol).	PN	No evidence of deviations due to this context.	NA		NA		PY	intention-to-treat analysis was adopted in this study.	NA		Low
2022/12/07 22.11	Larsen 2017	YONG			HIIT	wait list control	CRF	YYIRT1	assignment to intervention (the 'intention-to-treat' effect)	NA	1	Journal article(s)	Y	Y	Envelopes used and the independent researcher was blinded.	PY	Baseline YYIR1C for intervention group is 647m, while for control group is 712m.	Some concerns	Some concerns				PY	they were recruited beforehand and were blong to a bigger study.	NA		PN	No baseline difference identified.	Low	Low				Y	they are asked to do extra exercise in the morning.	PY	PY	the intervention were delivered in the morning at outdoor and by researchers. so both of them might know they are in intervention.	PN	No evidence of deviations because of this.	NA		NA		NI	no information regarding how many completed and dropped out.	PY	they excluded the data of incompletion participants while didn't report how many dropped out.	High
2022/11/17 21.37	Harris 2022	YONG			HIIT	wait list control	CRF	20 m shuttle run	assignment to intervention (the 'intention-to-treat' effect)	NA	1	Journal article(s)	PY	PY	randomised by class (post-baseline assessments, by sealed opaque envelopes)	PN	no baseline difference identified	Low	Low				PY	randomisation happened after recruitment	NA		PN	No baseline difference identified.	Low	Low				PY	contamination as a limitation, due to the control and intervention in the same school and they were treated differently.	PY	PY	contamination as a limitation, due to the control and intervention in the same school and they were treated differently.	PN	no information regarding deviation due to the context.	NA		NA		PY	intention to treat were adopted to account for the missing data.	NA		Low
2022/12/07 22.13	Ricci 2022	YONG			HIIT	wait list control	CRF	20 m shuttle run	assignment to intervention (the 'intention-to-treat' effect)	NA	1	Journal article(s)	PY	NI	with randomization occurring at the classroom level, however, no further information	PN	No evidence of baseline difference	Some concerns	Some concerns				PY	recruit first and randomisation after, see figure 1.	NA		PN	No baseline difference	Low	Low				PY	they are doing different training.	PY	PY	participants and deliverers might know as only intervention group are doing before school exercise training	NI	no informaition of deviations based on this.	NA		NA		PN	15 out of 67 dropped out	PY	15 out of 67 dropped out	High
2022/12/08 20.30	Buquet 2010	YONG			HIIT	wait list control	CRF		assignment to intervention (the 'intention-to-treat' effect)	NA	1	Journal article(s)	NI	PY	They stated the participants were randomised based on the school and classes, however without more information.	PN	No baseline difference.	Low	Low				PY	participants were recruited and then randomised.	NA		PN	No evidence of baseline imbalance.	Low	Low				PY	they might know they are in a trial as they doing the intervention.	PY	PY	They might know they are in a trial as both intervention and control in schools and no information regarding blinding.	NI	No evidence of deviation based on the context.	NA		NA		PN	No proper action is reported to account for the missing data.	PY	14 out of 77 dorpped out.	High
2022/12/08 20.54	Ketelhut 2020	YONG			HIIT	wait list control	CRF	6 minute run	assignment to intervention (the 'intention-to-treat' effect)	NA	1	Journal article(s)	PY	PY	The randomization was carried out by the principal investigator using a computer-generated random number table.	PY	control group is slightly better than intervention at baseline: 97.9 vs 88.1 (6 mins run test z-score)	Some concerns	Some concerns				PY	randomisation was based on the classes recruited.	NA		NI	no evidence showing differential in recruitment.	Low	Low				PY	they might know as they are doing the tests and intervention.	PY	PY	they might aware they are in the intervention as they from the one school and there is a control group	NI	No evidence of deviations due to the context.	NA		NA		PY	seems no one dropped out and two way anova is considered protper.	NA		Some concerns
[truncated: 50 more columns]

## Sheet: RoB for CRF (individual)
Basic information													Domain 1. Randomization process										Domain 2. Deviations from intended interventions																		Domain 3. Mising outcome data
Time	Unique ID	Assessor	Study ID	Reference	Experimental	Comparator	Outcome	Results	Aim	Effect of adhering to intervention?	Weight	Sources	1.1	1.2	Note for 1.1&1.2	1.3	Note for 1.3	1.0 Algorithm result	1.0 Assessor's Judgement	1.0 General note	1.0 Optional Question	1.0 Note for optional question	2.1	2.2	Note for 2.1&2.2	2.3	Note for 2.3	2.4	Note for 2.4	2.5	Note for 2.5	2.6	Note for 2.6	2.7	Note for 2.7	2.0 Algorithm result	2.0 Assessor's Judgement	2.0 General Notes	2.0 Optional Question	2.0 Note for optional question	3.1	Note for 3.1	3.2	Note for 3.2	3.3	Note for 3.3&3.4	3.4	Note for 3.4 (not use)	3.0 Algorithm result
2022/10/10 15.39	Chuensiri 2018	YONG			HIIT	wait list control	CRF	VO2peak	assignment to intervention (the 'intention-to-treat' effect)	NA	1	Journal article(s)	PY	PY	Specified participants were randomly allocated to intervention and control groups, and they use computer software to achieve that.	PY	All the groups have 16 participants, however, baseline VO2peak is different: 25.6 vs 28.8 for control and intervention.	Some concerns	Some concerns				PY	PY	Both participants and the carers might know the intervention groups.	NI	No sign of deviations due to the context.	NA		NA		Y	Differences in dropout rates from the exercise program were evaluated using nonparametric chi square test.	NA		Some concerns	Some concerns				PN	11 out of 48 dropped out.	PY	They account for the dropped out in the data analysis.	NA		NA		Low
2022/10/12 16.31	Costigan 2015	YONG			HIIT	wait list control	CRF	20m shuttle run	assignment to intervention (the 'intention-to-treat' effect)	NA	1	Journal article(s)	Y	Y	Radomisation was after baseline measurement and was managed by an independent researcher by using random number producing algorithm.	PN	22,21 and 22 for two intervention groups and the control group.	Low	Low				PY	PY	Participants and diliverers might aware that they are in the trail	NI	No sign of deviations due to the context.	NA		NA		Y	Linear mixed model used in the article might account for the missing data	NA		Some concerns	Some concerns				PN	52 out of 65 have data available regarding CRF.	PY	Linear mixed model used in the article might account for the missing data	NA		NA		Low
2022/10/21 11.20	Fernandez 2019	YONG			HIIT	wait list control	CRF	VO2peak	assignment to intervention (the 'intention-to-treat' effect)	NA	1	Journal article(s)	NI	NI	Only said participants were divided into intervention and control groups, not talked about how.	PN	13 vs 13 for intervention and control	Some concerns	Some concerns				PY	PY	both of them might know the intervention, as there are different exercises and researchers involved in.	NI	No sign of deviations from the intervention.	NA		NA		PY	repeated measure ANOVA was used and no dropped out	NA		Some concerns	Some concerns				Y	no dropped out mentioned	NA		NA		NA		Low
2022/10/21 16.01	McManus 2005	YONG			HIIT	wait list control	CRF	VO2peak	assignment to intervention (the 'intention-to-treat' effect)	NA	1	Journal article(s)	NI	NI	Only said participants were divided into intervention and control groups, not talked about how.	PN	no baseline difference indicated selection problems.	Some concerns	Some concerns				PY	PY	Might know as they were trained in a temporarily established lab.	NI	No sign of deviations due to the context.	NA		NA		PN	No appropriate analysis were adopted to account for the missing data.	PY	10 out of 45 dropped out from the intervention because of non-adherence.	High	High				PN	10 out of 45 dropped out from the intervention because of non-adherence.	PN	No sensitive analysis taken to account for the bias.	PY	No reason for the drop out data.	NI		High
2022/10/22 16.15	Racil 2016a	YONG			HIIT	wait list control	CRF	VO2peak	assignment to intervention (the 'intention-to-treat' effect)	NA	1	Journal article(s)	NI	NI	Only said participants were divided into intervention and control groups, not talked about how.	PN	No evidence of baseline differences in terms fo numbers of participants and baseline measurements	Some concerns	Some concerns				PY	PY	both of them might know as they are doing program exercises and tests.	NI	No sign of deviations due to the context.	NA		NA		PN	No appropriate analysis were adopted to account for the missing data.	PY	7 out of 75 dropped out with reasons not related to the intervention.	High	High				PY	7 out of 75 dropped out with reasons not related to the intervention.	PN	No sensitive analysis taken to account for the bias.	PN	Dropped out for personal reasons.	NA		Some concerns
2022/10/27 23.59	Lambrick 2016	YONG			HIIT	wait list control	CRF	VO2peak	assignment to intervention (the 'intention-to-treat' effect)	NA	1	Journal article(s)	Y	Y	The randomisation was stratified in terms of weight status and the used computerised number and sealed envelops.	PN	No baseline difference identified.	Low	Low				PY	PY	both participants and deliverers might know the trial and where they are allocated.	NI	No evidence and information of deviation.	NA		NA		PY	intention-to-treat was adopted in the article.	NA		Some concerns	Some concerns				Y	all the participants attended the post tests.	NA		NA		NA		Low
2022/10/30 10.48	Mucci 2013	YONG			HIIT	wait list control	CRF	VO2peak	assignment to intervention (the 'intention-to-treat' effect)	NA	1	Journal article(s)	NI	NI	Only said participants were divided into intervention and control groups, not talked about how.	PN	No evidence of baseline difference.	Some concerns	Some concerns				PY	PY	Participants might know they are in the trial as they doing additional exercises, no information regarding blinding.	NI	No evidence of deviations because of the context.	NA		NA		PN	No information regarding how to deal with the missing data.	PY	6 out of 24 droppted out.	High	High				PN	6 out of 24 droppted out.	PN	No information regarding how to deal with the missing data.	PY	six subjects were excluded because of technical problem during the tests (two subjects) or nonexploitable data in order to determine ventilatory thresholds or_x000D_ peak exercise parameters (four subjects).	PY		High
2022/10/30 12.08	Boddy 2010	YONG			HIIT	wait list control	CRF	VO2peak	assignment to intervention (the 'intention-to-treat' effect)	NA	1	Journal article(s)	PY	PY	Participants were randomly assigned to an experimental (n=8) or control group (n=8) by picking names out of a hat.	PN	No evidence of baseline difference.	Low	Low				PY	PY	Participants might know they are in a trial, however, no information regarding who is the deliverer and if the deliverer were blinded or not.	NI	No evidence of deviations because of the context.	NA		NA		PY	intention-to-treat was adopted.	NA		Some concerns	Some concerns				PY	Only one participants dropped out, and the data were included.	NA		NA		NA		Low
2022/10/31 11.38	Cao 2022a	YONG			HIIT	wait list control	CRF	20m shuttle run	assignment to intervention (the 'intention-to-treat' effect)	NA	1	Journal article(s)	PY	PY	The randomly allocated sequence was computer generated and sealed in sequentially numbered opaque envelopes.	PY	There is difference between control and intervention: 39.6 vs 43.8 respectively.	Some concerns	Some concerns				PY	PY	They were doing diffrent exercises during PE classes with researchers. So, both of them might know they are in the intervention group.	NI	No evidence of deviations because of the context.	NA		NA		PY	They used two way ANOVA, and no subjects dropped out from the intervention. So the analysis might be appropriate.	NA		Low	Low				Y	All the participants have pre and post data.	NA		NA		NA		Low
2022/10/31 14.05	Cao 2022b	YONG			HIIT	wait list control	CRF	VO2peak	assignment to intervention (the 'intention-to-treat' effect)	NA	1	Journal article(s)	PY	PY	In this study, a simple randomization method was used to generate random_x000D_ numbers by SPSS software. The person who determined the random assignment table did not participate in the inclusion of subjects.	PN	No baseline differences identified. see table 2.	Low	Low				PN	PY	The participants and data Analyst were blinded after allocation. not specify how the participants were blinded. However, the deliverer were researchers, which might aware the intervention groups.	NI	No evidence of deviations because of the context.	NA		NA		PN	9 out of 45 (20%) dropped out and ruled out from the data analysis.	PY	9 out of 45 (20%) dropped out and ruled out from the data analysis.	High	High				PN	9 out of 45 (20%) dropped out	PN	no information regarding how to deal with the missing data.	PN	dropped out for reasons unrelated to the intervention.	NA		Low
2022/11/05 10.15	Racil 2013	YONG			HIIT	wait list control	CRF	VO2peak	assignment to intervention (the 'intention-to-treat' effect)	NA	1	Journal article(s)	NI	NI	Only said participants were divided into intervention and control groups, not talked about how.	PN	No baseline difference identified. See table 2.	Some concerns	Some concerns				NI	NI	No information regarding blinding. Given there was a MIIT group as well, instead of probably yes, maybe no information is more accurate here.	NI	No evidence of deviations because of the context.	NA		NA		PN	No information regarding how to deal with the missing data.	PN	only 2 dropped out, might not substantially influence the outcome.	Some concerns	Some concerns				PY	Two subjects dropped out because of reasons unrelated to the intervention and were excluded to the data analysis.	NA		NA		NA		Low
2022/11/05 11.05	Racil 2016b	YONG			HIIT	wait list control	CRF	VO2peak	assignment to intervention (the 'intention-to-treat' effect)	NA	1	Journal article(s)	NI	NI	Only said participants were divided into intervention and control groups, not talked about how.	PN	No evidence of baseline difference, see table 2	Some concerns	Some concerns				NI	NI	No infermation regarding blinding. Given there are both HIIT and MIIT groups, I would make this question as NI instead of PY.	NI	No information regarding deviation.	NA		NA		PY	two way repeated measure ANOVA was used, and no dropped out in this study, so the analysis might be appropriate.	NA		Some concerns	Some concerns				Y	No dropped out.	NA		NA		NA		Low
2022/11/05 16.19	Gamelin 2009	YONG			HIIT	wait list control	CRF	VO2peak	assignment to intervention (the 'intention-to-treat' effect)	NA	1	Journal article(s)	NI	NI	Only said participants were divided into intervention and control groups, not talked about how.	PN	No evidence of imbalance between intervention and control at baseline. see table 1.	Some concerns	Some concerns				PY	PY	both PE teachers and participants might know they are in a trial.	NI	No evidence of deviations because of the context.	NA		NA		PN	No further information regarding how to deal with the missing data.	PY	14 out of 52 were dropped out.	High	High				PN	14 out of 52 dropped out.	PN	No evidence of dealing with the missing data.	PY	dropped out because of they did not reached the criteria for maximal tests, which may be due to their fitness condition._x000D_ large rate of dropped out might have influenced the outcomes.	PY		High
2022/11/05 21.57	Cvetkovic 2018	YONG			HIIT	wait list control	CRF	YYIRT1	assignment to intervention (the 'intention-to-treat' effect)	NA	1	Journal article(s)	NI	NI	Only said participants were divided into intervention and control groups, not talked about how.	PN	no significant baseline differences identified.	Some concerns	Some concerns				PY	PY	The intervention was delivered by investigators outside of PE classes, as a result, both of them might know they are in a trial.	NI	No evidence of deviations because of the context.	NA		NA		PN	No information regarding how to deal with the missing data.	PY	7 out of 45 dropped out	High	High				PN	7 out of 45 dropped out.	PN	no information regarding how to deal with the misssing data.	PN	one dropped out because injury, one because of missing post test, others were due to lack of time.	NA		Some concerns
2022/11/16 22.27	Bogataj 2021	YONG			HIIT	wait list control	CRF	YYIRT1	assignment to intervention (the 'intention-to-treat' effect)	NA	1	Journal article(s)	PY	NI	Only stated that the participants were randomised to intervention and control groups, without any further information.	PN	No baseline difference	Some concerns	Some concerns				PY	PY	the participants were taken out form the PE classes and the intervention was delivered by the researchers.	NI	No evidence of deviations.	NA		NA		PN	No information regarding how to deal with the missing data.	PN	only 2 dropped out	Some concerns	Some concerns				PY	only 2 dropped out	NA		NA		NA		Low
2022/10/06 14.55	Angel 2021	YONG			HIIT	wait-list control	CRF	20m shuttle run	assignment to intervention (the 'intention-to-treat' effect)	NA	1	Journal article(s)	Y	Y	Randomisation was conducted independently by a research assistant who was not involved in the data collection, using random numbers generated in Microsoft Excel 2010.	N	control 56, intervention 58, see figure 1.	Low	Low				PY	PY	Participants and the deliverers may aware as they doing the tests and exercises.	NI	No evidence of deviations because of the context.	NA		NA		PN	No information regarding how to deal with the missing data.	PN	probabely not as the dropped out rate is low: 4%.	Some concerns	Some concerns				PY	only 4% dropped out.	NA		NA		NA		Low
2022/12/08 18.33	Engel 2019	YONG			HIIT	wait list control	CRF	6 minutes run	assignment to intervention (the 'intention-to-treat' effect)	NA	1	Journal article(s)	NI	PY	They said randomised only, no further information. Allocation taken place until all the participants enrolled.	PY	slightly baseline different based on the 6 minutes run: 1124 vs 1055m for intervention and control groups.	Some concerns	Some concerns				PY	PY	probably aware as they are doing different exercises.	NI	no evidence of deviation based on the context.	NA		NA		PY	No dropped out participants and two way ANOVA is considered proper way for analysis.	NA		Some concerns	Some concerns				Y	all completed.	NA		NA		NA		Low
2022/11/26 15.45	Williams 2022	YONG			HIIT	wait list control	CRF	20 m shuttle run	assignment to intervention (the 'intention-to-treat' effect)	NA	1	Journal article(s)	PY	PY	Participants were randomized to either_x000D_ the intervention group (sprint training) or a control group_x000D_ (continued their daily routines)—this was achieved by the_x000D_ liaising teacher selecting participants names from a container_x000D_ and using the “ABBA” approach for group assignment	PY	850 ± 323 vs 798 ± 367 in meters at baseline for intervention and control	Some concerns	Some concerns				PY	PY	the intervention was delivered before school, so they probably know they are in the intervention trial.	NI	No evidence of deviations.	NA		NA		PN	4 out of 20 dropped out and no information about how to deal with missing data.	PY	4 out of 20 dropped out and no information about how to deal with missing data.	High	High				PN	4 out of 20 dropped out and no information about how to deal with missing data.	PN	4 out of 20 dropped out and no information about how to deal with missing data.	PY	2 dropped out because of illness and 2 due to covid	PY		High
[truncated: 35 more columns]

## Sheet: RoB for BC (cluster)
Basic information													Domain 1a. Randomization process										Domain 1b: Risk of bias arising from the timing of identification or recruitment of participants											Domain 2. Deviations from intended interventions
Time	Unique ID	Assessor	Study ID	Reference	Experimental	Comparator	Outcome	Results	Aim	Effect of adhering to intervention?	Weight	Sources	1a.1	1a.2	Note for 1a.1&1a.2	1a.3	Note for 1a.3	1a.0 Algorithm result	1a.0 Assessor's Judgement	1a.0 General note	1a.0 Optional Question	1a.0 Note for optional question	1b.1	Note for 1b.1	1b.2	Note for 1b.2	1b.3	Note for 1b.3	1b.0 Algorithm result	1b.0 Assessor's Judgement	1b.0 General note	1b.0 Optional Question	1b.0 Note for optional question	2.1a	Note for 2.1a	2.1b (2.1)	2.2	Note for 2.1b&2.2	2.3	Note for 2.3	2.4	Note for 2.4	2.5	Note for 2.5	2.6	Note for 2.6	2.7	Note for 2.7	2.0 Algorithm result
2022/10/03 16.29	Lubans 2020	YONG			HIIT	wait-list control	Body composition	BMI-z	assignment to intervention (the 'intention-to-treat' effect)	NA	1	Journal article(s); Trial protocol	Y	Y	Paired schools (within cohorts) were randomised by an independent researcher using a computer-based random number generator.	N	No baseline difference identified.	Low	Low				Y	Randomisation took place after baseline measurement.	NA		N	No imbalances exist at baseline (table 2).	Low	Low				PY	Did not mention, but most probably yes.	NI	PY	as they doing extra exercises during academic classes, both students and deliverers (teacher) might aware that they are in the trial.	PN	No evidence show the intervention effect will be changed due to the trial context.	NA		NA		Y	linear mixed model was used.	NA		Low
2022/12/08 15.09	X4A_Win 2019	YONG			HIIT	wait-list control	Body composition	BMI	assignment to intervention (the 'intention-to-treat' effect)	NA	1	Journal article(s)	Y	NI	Cluster randomization was used to select 1 intervention and 4 control schools in South Wales. no information regarding if allocation sequence concealed.	PN	No baseline difference identified.	Some concerns	Some concerns				PY	They were selected before randomised as they are from a bigger study.	NA		PN	No baseline difference on VO2peak	Low	Low				PY	They were selected and doing different exercises.	PY	PY	they might know they are in the intervention group and no information regarding blinding.	PN	No evidence of deviations based on the context.	NA		NA		PY	mixed linear regression models was used which is considered to taking the missing data into account.	NA		Low
2022/10/13 17.31	Harris 2021	YONG			HIIT	wait list control	Body composition	% body fat	assignment to intervention (the 'intention-to-treat' effect)	NA	1	Journal article(s)	Y	Y	After baseline testing, one classwithin each school was randomized via blank envelope selection to either the intervention or control, by class group.	PN	No baseline difference identified.	Low	Low				Y	Randomisation commenced after baseline measurement.	NA		PN	No evidence of baseline imbalance.	Low	Low				PY	with the measurement and the exercise training, they might know they are in a trail.	PY	PY	Both deliverers and participants might know they were assigned to intervention as they are doing the exercises.	PN	No evidence of deviation due to the context.	NA		NA		PY	Intention-to-treat ananlysis was adopted in the study.	NA		Low
2022/10/17 10.55	Takehara 2021	YONG			HIIT	wait list control	Body composition	BMI	assignment to intervention (the 'intention-to-treat' effect)	NA	1	Journal article(s); Trial protocol	Y	Y	Using computer-generated random numbers, also stratified residential area.	PN	No baseline difference identified.	Low	Low				Y	Randomisation after recruitment and stratified into Urban and mixed residential area.	NA		N	No baseline imbalances identified.	Low	Low				PY	There are participants in the control and intervention group at the same school. They may aware they are in a trial as they did the intervention	PY	PY	Both participants and deliverers may aware the assignment of a intervention group as they are doing different exercise and the intervention is delivered by researchers.	PN	No signs of deviation because of the context.	NA		NA		Y	They adopted the intensiton to treat method	NA		Low
2022/10/26 16.43	Vizcaino 2021	YONG			HIIT	wait list control	Body composition	% body fat	assignment to intervention (the 'intention-to-treat' effect)	NA	1	Journal article(s); Trial protocol	PY	PY	only statement that the intervention is a cluster-randomisation study, no further information. However, they use 'exploration of outlier values was performed to_x000D_ assess the effectiveness of the randomization processes'.	PN	no baseline differences suggest problem with the randomisation process.	Low	Low				PY	see figure 1, randomisation happened after recruitment.	NA		PN	No baseline imbalances identified. see table 1.	Low	Low				PY	Paticipants probably know they are in a trial as they doing additional exercises.	PY	PY	Although this is a randomized controlled trial, children, parents, and teachers could not be blinded regarding the allocation group and some bias could be derived from this fact (cited from the protocol).	PN	No evidence of deviations due to this context.	NA		NA		PY	intention-to-treat analysis was adopted in this study.	NA		Low
2022/12/08 20.30	Buquet 2010	YONG			HIIT	wait list control	Body composition	BMI	assignment to intervention (the 'intention-to-treat' effect)	NA	1	Journal article(s)	NI	PY	They stated the participants were randomised based on the school and classes, however without more information.	PN	No baseline difference.	Low	Low				PY	participants were recruited and then randomised.	NA		PN	No evidence of baseline imbalance.	Low	Low				PY	they might know they are in a trial as they doing the intervention.	PY	PY	They might know they are in a trial as both intervention and control in schools and no information regarding blinding.	NI	No evidence of deviation based on the context.	NA		NA		PN	No proper action is reported to account for the missing data.	PY	14 out of 77 dorpped out.	High
2022/12/09 09.56	Baquet 2004	YONG			HIIT	wait list control	body composition	% body fat	assignment to intervention (the 'intention-to-treat' effect)	NA	1	Journal article(s)	NI	NI	Only stated that the participants were allocated based on their grades, however, nothing else.	PN	No baseline difference identified.	Some concerns	Some concerns				PY	randomisation taken after recruitment.	NA		PN	No baseline difference.	Low	Low				PY	yes, as they are doing different exercises and tests.	NI	NI	they were from four different schools and no information regarding blinding.	NI	No evidence of deviation based on this	NA		NA		PN	28 dropped out and were excluded to the data analysis.	PY	28 dropped out and were excluded to the data analysis.	High
[truncated: 50 more columns]

## Sheet: RoB for BC (individual)
Time	Unique ID	Assessor	Study ID	Reference	Experimental	Comparator	Outcome	Results	Aim	Effect of adhering to intervention?	Weight	Sources	1.1	1.2	Note for 1.1&1.2	1.3	Note for 1.3	1.0 Algorithm result	1.0 Assessor's Judgement	1.0 General note	1.0 Optional Question	1.0 Note for optional question	2.1	2.2	Note for 2.1&2.2	2.3	Note for 2.3	2.4	Note for 2.4	2.5	Note for 2.5	2.6	Note for 2.6	2.7	Note for 2.7	2.0 Algorithm result	2.0 Assessor's Judgement	2.0 General Notes	2.0 Optional Question	2.0 Note for optional question	3.1	Note for 3.1	3.2	Note for 3.2	3.3	Note for 3.3&3.4	3.4	Note for 3.4 (not use)	3.0 Algorithm result
2022/10/10 15.39	Chuensiri 2018	YONG			HIIT	wait list control	CRF	% body fat	assignment to intervention (the 'intention-to-treat' effect)	NA	1	Journal article(s)	PY	PY	Specified participants were randomly allocated to intervention and control groups, and they use computer software to achieve that.	PY	All the groups have 16 participants, however, baseline % body fat is different: 25.3 vs 22.9 for control and intervention.	Some concerns	Some concerns				PY	PY	Both participants and the carers might know the intervention groups.	NI	No sign of deviations due to the context.	NA		NA		Y	Differences in dropout rates from the exercise program were evaluated using nonparametric chi square test.	NA		Some concerns	Some concerns				PN	11 out of 48 dropped out.	PY	They account for the dropped out in the data analysis.	NA		NA		Low
2022/10/12 16.31	Costigan 2015	YONG			HIIT	wait list control	CRF	BMI	assignment to intervention (the 'intention-to-treat' effect)	NA	1	Journal article(s)	Y	Y	Radomisation was after baseline measurement and was managed by an independent researcher by using random number producing algorithm.	PN	No difference between control and intervention at baseline in terms of BMI.	Low	Low				PY	PY	Participants and diliverers might aware that they are in the trail	NI	No sign of deviations due to the context.	NA		NA		Y	Linear mixed model used in the article might account for the missing data	NA		Some concerns	Some concerns				PN	52 out of 65 have data available regarding CRF.	PY	Linear mixed model used in the article might account for the missing data	NA		NA		Low
2022/10/21 11.20	Fernandez 2019	YONG			HIIT	wait list control	CRF	fat mass	assignment to intervention (the 'intention-to-treat' effect)	NA	1	Journal article(s)	NI	NI	Only said participants were divided into intervention and control groups, not talked about how.	PN	No difference between control and intervention at baseline in terms of fat mass.	Some concerns	Some concerns				PY	PY	both of them might know the intervention, as there are different exercises and researchers involved in.	NI	No sign of deviations from the intervention.	NA		NA		PY	repeated measure ANOVA was used and no dropped out	NA		Some concerns	Some concerns				Y	no dropped out mentioned	NA		NA		NA		Low
2022/10/22 16.15	Racil 2016a	YONG			HIIT	wait list control	CRF	% body fat	assignment to intervention (the 'intention-to-treat' effect)	NA	1	Journal article(s)	NI	NI	Only said participants were divided into intervention and control groups, not talked about how.	PN	No evidence of baseline differences in terms fo numbers of participants and baseline measurements	Some concerns	Some concerns				PY	PY	both of them might know as they are doing program exercises and tests.	NI	No sign of deviations due to the context.	NA		NA		PN	No appropriate analysis were adopted to account for the missing data.	PY	7 out of 75 dropped out with reasons not related to the intervention.	High	High				PY	7 out of 75 dropped out with reasons not related to the intervention.	PN	No sensitive analysis taken to account for the bias.	PN	Dropped out for personal reasons.	NA		Some concerns
2022/10/27 23.59	Lambrick 2016	YONG			HIIT	wait list control	CRF	% body fat	assignment to intervention (the 'intention-to-treat' effect)	NA	1	Journal article(s)	Y	Y	The randomisation was stratified in terms of weight status and the used computerised number and sealed envelops.	PY	baseline % body fat is different: 25.9 vs 23.1 for control and intervention.	Some concerns	Some concerns				PY	PY	both participants and deliverers might know the trial and where they are allocated.	NI	No evidence and information of deviation.	NA		NA		PY	intention-to-treat was adopted in the article.	NA		Some concerns	Some concerns				Y	all the participants attended the post tests.	NA		NA		NA		Low
2022/10/30 10.48	Nourry 2005	YONG			HIIT	wait list control	CRF	% body fat	assignment to intervention (the 'intention-to-treat' effect)	NA	1	Journal article(s)	NI	NI	Only said participants were divided into intervention and control groups, not talked about how.	PY	baseline % body fat is different: 16.4 vs 19 for control and intervention.	Some concerns	Some concerns				PY	PY	Participants might know they are in the trial as they doing additional exercises, no information regarding blinding.	NI	No evidence of deviations because of the context.	NA		NA		PN	No information regarding how to deal with the missing data.	PY	6 out of 24 droppted out.	High	High				PN	6 out of 24 droppted out.	PN	No information regarding how to deal with the missing data.	PY	six subjects were excluded because of technical problem during the tests (two subjects) or nonexploitable data in order to determine ventilatory thresholds or_x000D_ peak exercise parameters (four subjects).	PY		High
2022/10/30 12.08	Boddy 2010	YONG			HIIT	wait list control	CRF	% body fat	assignment to intervention (the 'intention-to-treat' effect)	NA	1	Journal article(s)	PY	PY	Participants were randomly assigned to an experimental (n=8) or control group (n=8) by picking names out of a hat.	PY	BMI at baseline is 24.3 vs 21.1 for intervention and control group respectively.	Some concerns	Some concerns				PY	PY	Participants might know they are in a trial, however, no information regarding who is the deliverer and if the deliverer were blinded or not.	NI	No evidence of deviations because of the context.	NA		NA		PY	intention-to-treat was adopted.	NA		Some concerns	Some concerns				PY	Only one participants dropped out, and the data were included.	NA		NA		NA		Low
2022/10/31 11.38	Cao 2022a	YONG			HIIT	wait list control	CRF	BMI	assignment to intervention (the 'intention-to-treat' effect)	NA	1	Journal article(s)	PY	PY	The randomly allocated sequence was computer generated and sealed in sequentially numbered opaque envelopes.	PN	No evidence of baseline differences in terms fo numbers of participants and baseline measurements	Low	Low				PY	PY	They were doing diffrent exercises during PE classes with researchers. So, both of them might know they are in the intervention group.	NI	No evidence of deviations because of the context.	NA		NA		PY	They used two way ANOVA, and no subjects dropped out from the intervention. So the analysis might be appropriate.	NA		Low	Low				Y	All the participants have pre and post data.	NA		NA		NA		Low
2022/10/31 14.05	Cao 2022b	YONG			HIIT	wait list control	CRF	BMI	assignment to intervention (the 'intention-to-treat' effect)	NA	1	Journal article(s)	PY	PY	In this study, a simple randomization method was used to generate random numbers by SPSS software. The person who determined the random assignment table did not participate in the inclusion of subjects.	PN	No baseline differences identified. see table 2.	Low	Low				PN	PY	The participants and data Analyst were blinded after allocation. not specify how the participants were blinded. However, the deliverer were researchers, which might aware the intervention groups.	NI	No evidence of deviations because of the context.	NA		NA		PN	9 out of 45 (20%) dropped out and ruled out from the data analysis.	PY	9 out of 45 (20%) dropped out and ruled out from the data analysis.	High	High				PN	9 out of 45 (20%) dropped out	PN	no information regarding how to deal with the missing data.	PN	dropped out for reasons unrelated to the intervention.	NA		Low
2022/11/05 10.15	Racil 2013	YONG			HIIT	wait list control	CRF	% body fat	assignment to intervention (the 'intention-to-treat' effect)	NA	1	Journal article(s)	NI	NI	Only said participants were divided into intervention and control groups, not talked about how.	PY	baseline % body fat is different: 37.2 vs 35.8 for control and intervention. See table 2.	Some concerns	Some concerns				NI	NI	No information regarding blinding. Given there was a MIIT group as well, instead of probably yes, maybe no information is more accurate here.	NI	No evidence of deviations because of the context.	NA		NA		PN	No information regarding how to deal with the missing data.	PN	only 2 dropped out, might not substantially influence the outcome.	Some concerns	Some concerns				PY	Two subjects dropped out because of reasons unrelated to the intervention and were excluded to the data analysis.	NA		NA		NA		Low
2022/11/05 11.05	Racil 2016b	YONG			HIIT	wait list control	CRF	% body fat	assignment to intervention (the 'intention-to-treat' effect)	NA	1	Journal article(s)	NI	NI	Only said participants were divided into intervention and control groups, not talked about how.	PN	No evidence of baseline difference, see table 2	Some concerns	Some concerns				NI	NI	No infermation regarding blinding. Given there are both HIIT and MIIT groups, I would make this question as NI instead of PY.	NI	No information regarding deviation.	NA		NA		PY	two way repeated measure ANOVA was used, and no dropped out in this study, so the analysis might be appropriate.	NA		Some concerns	Some concerns				Y	No dropped out.	NA		NA		NA		Low
2022/11/05 21.57	Cvetkovic 2018	YONG			HIIT	wait list control	CRF	% body fat	assignment to intervention (the 'intention-to-treat' effect)	NA	1	Journal article(s)	NI	NI	Only said participants were divided into intervention and control groups, not talked about how.	PY	baseline % body fat is different: 29.9 vs 32.9 for control and intervention	Some concerns	Some concerns				PY	PY	The intervention was delivered by investigators outside of PE classes, as a result, both of them might know they are in a trial.	NI	No evidence of deviations because of the context.	NA		NA		PN	No information regarding how to deal with the missing data.	PY	7 out of 45 dropped out	High	High				PN	7 out of 45 dropped out.	PN	no information regarding how to deal with the misssing data.	PN	one dropped out because injury, one because of missing post test, others were due to lack of time.	NA		Some concerns
2022/12/08 18.33	Engel 2019	YONG			HIIT	wait list control	CRF	BMI	assignment to intervention (the 'intention-to-treat' effect)	NA	1	Journal article(s)	NI	PY	They said randomised only, no further information. Allocation taken place until all the participants enrolled.	PY	slightly baseline different based on the baseline % body fat: 18.2 vs 16.4 for control and intervention	Some concerns	Some concerns				PY	PY	probably aware as they are doing different exercises.	NI	no evidence of deviation based on the context.	NA		NA		PY	No dropped out participants and two way ANOVA is considered proper way for analysis.	NA		Some concerns	Some concerns				Y	all completed.	NA		NA		NA		Low
2022/10/26 10.33	Popowczak 2022	YONG			HIIT	wait list control	body composition	BMI	assignment to intervention (the 'intention-to-treat' effect)	NA	1	Journal article(s)	PY	PY	Simple, non-returnable group randomization was conducted using the tool provided on the website.	PN	No difference between control and intervention at baseline in terms of BMI.	Low	Low				PY	PY	They might aware as they doing different exercises during PE classes.	NI	no evidence of deviation based on the context.	NA		NA		PN	19 out of 141 dropped out. No evidence of proper means has been taken to address the non-adherence.	PY	19 out of 141 dropped out. No evidence of proper means has been taken to address the non-adherence.	High	High				PN	19 out of 141 dropped out	PN	No evidence of how to addree the missing data	NI	Due to absence of PE class, the participants were ruled out, but no reason why did not attend the class. In addition, there is imblance in dropping out rate between intervention and control groups. See figure 1.	PY		High
2022/10/18 21.05	Abassi 2021	YONG			HIIT	wait list control	body composition	BMI	assignment to intervention (the 'intention-to-treat' effect)	NA	1	Journal article(s)	NI	NI	Participants were randomly assigned to groups, however, did not specify how.	PN	No difference between control and intervention at baseline in terms of % body fat.	Some concerns	Some concerns				PY	PY	As they were recruited and doing exercises, both carer and participants might know that they are in a trial.	NI	no evidence of deviation based on the context.	NA		NA		PN	5 out of 43 dropped out.	PY	5 out of 43 dropped out.	High	High				PY	5 out of 43 dropped out because of reasons not related to the intervention.	PN	No sensitive analysis taken to account for the bias.	PN	Dropped out for reasons unrelated to the intervention.	NA		Some concerns
[truncated: 35 more columns]

## Sheet: RoB for MF (cluster)
Basic information													Domain 1a. Randomization process										Domain 1b: Risk of bias arising from the timing of identification or recruitment of participants											Domain 2. Deviations from intended interventions
Time	Unique ID	Assessor	Study ID	Reference	Experimental	Comparator	Outcome	Results	Aim	Effect of adhering to intervention?	Weight	Sources	1a.1	1a.2	Note for 1a.1&1a.2	1a.3	Note for 1a.3	1a.0 Algorithm result	1a.0 Assessor's Judgement	1a.0 General note	1a.0 Optional Question	1a.0 Note for optional question	1b.1	Note for 1b.1	1b.2	Note for 1b.2	1b.3	Note for 1b.3	1b.0 Algorithm result	1b.0 Assessor's Judgement	1b.0 General note	1b.0 Optional Question	1b.0 Note for optional question	2.1a	Note for 2.1a	2.1b (2.1)	2.2	Note for 2.1b&2.2	2.3	Note for 2.3	2.4	Note for 2.4	2.5	Note for 2.5	2.6	Note for 2.6	2.7	Note for 2.7	2.0 Algorithm result
2022/10/03 16.29	Lubans 2020	YONG			HIIT	wait-list control	muscular strength	standing long jump	assignment to intervention (the 'intention-to-treat' effect)	NA	1	Journal article(s); Trial protocol	Y	Y	Paired schools (within cohorts) were randomised by an independent researcher using a computer-based random number generator.	N	No significant difference between intervention and control group at baseline	Low	Low				Y	Randomisation took place after baseline measurement.	NA		N	No imbalances exist at baseline (table 2).	Low	Low				PY	Did not mention, but most probably yes.	NI	PY	as they doing extra exercises during academic classes, both students and deliverers (teacher) might aware that they are in the trial.	NI	No evidence show the intervention effect will be changed due to the trial context.	NA		NA		Y	linear mixed model was used.	NA		Low
2022/10/13 17.31	Harris 2021	YONG			HIIT	wait list control	muscular strength	push-ups	assignment to intervention (the 'intention-to-treat' effect)	NA	1	Journal article(s)	Y	Y	After baseline testing, one classwithin each school was randomized via blank envelope selection to either the intervention or control, by class group.	PN	No significant difference between intervention and control group at baseline	Low	Low				Y	Randomisation commenced after baseline measurement.	NA		PN	No evidence of baseline imbalance.	Low	Low				PY	with the measurement and the exercise training, they might know they are in a trail.	PY	PY	Both deliverers and participants might know they were assigned to intervention as they are doing the exercises.	NI	No evidence of deviation due to the context.	NA		NA		PY	Intention-to-treat ananlysis was adopted in the study.	NA		Low
2022/10/26 16.43	Vizcaino 2021	YONG			HIIT	wait list control	muscular strength	hand-grip	assignment to intervention (the 'intention-to-treat' effect)	NA	1	Journal article(s); Trial protocol	PY	PY	only statement that the intervention is a cluster-randomisation study, no further information. However, they use 'exploration of outlier values was performed to_x000D_ assess the effectiveness of the randomization processes'.	PN	No significant difference between intervention and control group at baseline	Low	Low				PY	see figure 1, randomisation happened after recruitment.	NA		PN	No baseline imbalances identified. see table 1.	Low	Low				PY	Paticipants probably know they are in a trial as they doing additional exercises.	PY	PY	Although this is a randomized controlled trial, children, parents, and teachers could not be blinded regarding the allocation group and some bias could be derived from this fact (cited from the protocol).	NI	No evidence of deviations due to this context.	NA		NA		PY	intention-to-treat analysis was adopted in this study.	NA		Low
2022/11/17 21.37	Harris 2022	YONG			HIIT	wait list control	muscular strength	push-ups	assignment to intervention (the 'intention-to-treat' effect)	NA	1	Journal article(s)	PY	PY	randomised by class (post-baseline assessments, by sealed opaque envelopes)	PN	no baseline difference identified	Low	Low				PY	randomisation happened after recruitment	NA		PN	No baseline difference identified.	Low	Low				PY	contamination as a limitation, due to the control and intervention in the same school and they were treated differently.	PY	PY	contamination as a limitation, due to the control and intervention in the same school and they were treated differently.	NI	no information regarding deviation due to the context.	NA		NA		PY	intention to treat were adopted to account for the missing data.	NA		Low
2022/12/07 22.13	Ricci 2022	YONG			HIIT	wait list control	muscular strength	push-ups	assignment to intervention (the 'intention-to-treat' effect)	NA	1	Journal article(s)	NI	NI	with randomization occurring at the classroom level, however, no further information	PN	No evidence of baseline difference	Some concerns	Some concerns				PY	recruit first and randomisation after, see figure 1.	NA		PN	No baseline difference	Low	Low				PY	they are doing different training.	PY	PY	participants and deliverers might know as only intervention group are doing before school exercise training	NI	no informaition of deviations based on this.	NA		NA		PN	15 out of 67 dropped out and the data were excluded for analysis	PY	15 out of 67 dropped out and the data were excluded for analysis	High
2022/12/08 20.30	Buquet 2004	YONG			HIIT	wait list control	Body composition	standing long jump	assignment to intervention (the 'intention-to-treat' effect)	NA	1	Journal article(s)	NI	NI	They stated the participants were randomised based on the school and classes, however without more information.	PN	No baseline difference.	Some concerns	Some concerns				PY	participants were recruited and then randomised.	NA		PN	No evidence of baseline imbalance.	Low	Low				PY	they might know they are in a trial as they doing the intervention.	PY	PY	They might know they are in a trial as both intervention and control in schools and no information regarding blinding.	NI	No evidence of deviation based on the context.	NA		NA		PN	No proper action is reported to account for the missing data.	PY	14 out of 77 dorpped out.	High
[truncated: 50 more columns]

## Sheet: RoB for MF (individual)
Basic information													Domain 1. Randomization process										Domain 2. Deviations from intended interventions																		Domain 3. Mising outcome data
Time	Unique ID	Assessor	Study ID	Reference	Experimental	Comparator	Outcome	Results	Aim	Effect of adhering to intervention?	Weight	Sources	1.1	1.2	Note for 1.1&1.2	1.3	Note for 1.3	1.0 Algorithm result	1.0 Assessor's Judgement	1.0 General note	1.0 Optional Question	1.0 Note for optional question	2.1	2.2	Note for 2.1&2.2	2.3	Note for 2.3	2.4	Note for 2.4	2.5	Note for 2.5	2.6	Note for 2.6	2.7	Note for 2.7	2.0 Algorithm result	2.0 Assessor's Judgement	2.0 General Notes	2.0 Optional Question	2.0 Note for optional question	3.1	Note for 3.1	3.2	Note for 3.2	3.3	Note for 3.3&3.4	3.4	Note for 3.4 (not use)	3.0 Algorithm result
2022/10/10 15.39	Chuensiri 2018	YONG			HIIT	wait list control	muscular strength	Leg muscle strength	assignment to intervention (the 'intention-to-treat' effect)	NA	1	Journal article(s)	PY	PY	Specified participants were randomly allocated to intervention and control groups, and they use computer software to achieve that.	PY	All the groups have 16 participants, no baseline difference	Low	Low				PY	PY	Both participants and the carers might know the intervention groups.	NI	No sign of deviations due to the context.	NA		NA		Y	Differences in dropout rates from the exercise program were evaluated using nonparametric chi square test.	NA		Some concerns	Some concerns				PN	11 out of 48 dropped out.	PY	They account for the dropped out in the data analysis.	NA		NA		Low
2022/10/12 16.31	Costigan 2015	YONG			HIIT	wait list control	muscular strength	standing long jump	assignment to intervention (the 'intention-to-treat' effect)	NA	1	Journal article(s)	Y	Y	Radomisation was after baseline measurement and was managed by an independent researcher by using random number producing algorithm.	PN	No baseline difference	Low	Low				PY	PY	Participants and diliverers might aware that they are in the trail	NI	No sign of deviations due to the context.	NA		NA		Y	Linear mixed model used in the article might account for the missing data	NA		Some concerns	Some concerns				PN	52 out of 65 have data available regarding CRF.	PY	Linear mixed model used in the article might account for the missing data	NA		NA		Low
2022/10/22 16.15	Racil 2016a	YONG			HIIT	wait list control	muscular strength	counter movement jump	assignment to intervention (the 'intention-to-treat' effect)	NA	1	Journal article(s)	NI	NI	Only said participants were divided into intervention and control groups, not talked about how.	PN	No evidence of baseline differences in terms fo numbers of participants and baseline measurements	Some concerns	Some concerns				PY	PY	both of them might know as they are doing program exercises and tests.	NI	No sign of deviations due to the context.	NA		NA		PN	No appropriate analysis were adopted to account for the missing data.	PY	7 out of 75 dropped out with reasons not related to the intervention.	High	High				PY	7 out of 75 dropped out with reasons not related to the intervention.	PN	No sensitive analysis taken to account for the bias.	PN	Dropped out for personal reasons.	NA		Some concerns
2022/11/05 21.57	Cvetkovic 2018	YONG			HIIT	wait list control	muscular strength	counter movement jump	assignment to intervention (the 'intention-to-treat' effect)	NA	1	Journal article(s)	NI	NI	Only said participants were divided into intervention and control groups, not talked about how.	PN	no significant baseline differences identified.	Some concerns	Some concerns				PY	PY	The intervention was delivered by investigators outside of PE classes, as a result, both of them might know they are in a trial.	NI	No evidence of deviations because of the context.	NA		NA		PN	No information regarding how to deal with the missing data.	PY	7 out of 45 dropped out	High	High				PN	7 out of 45 dropped out.	PN	no information regarding how to deal with the misssing data.	PN	one dropped out because injury, one because of missing post test, others were due to lack of time.	NA		Some concerns
2022/11/16 22.27	Bogataj 2021	YONG			HIIT	wait list control	muscular strength	hand-grip	assignment to intervention (the 'intention-to-treat' effect)	NA	1	Journal article(s)	NI	NI	Only stated that the participants were randomised to intervention and control groups, without any further information.	PN	No baseline difference	Some concerns	Some concerns				PY	PY	the participants were taken out form the PE classes and the intervention was delivered by the researchers.	NI	No evidence of deviations.	NA		NA		PN	No information regarding how to deal with the missing data.	PN	only 2 dropped out	Some concerns	Some concerns				PY	only 2 dropped out	NA		NA		NA		Low
2022/10/06 14.55	Angel 2021	YONG			HIIT	wait-list control	muscular strength	hand-grip	assignment to intervention (the 'intention-to-treat' effect)	NA	1	Journal article(s)	Y	Y	Randomisation was conducted independently by a research assistant who was not involved in the data collection, using random numbers generated in Microsoft Excel 2010.	N	No baseline difference	Low	Low				PY	PY	Participants and the deliverers may aware as they doing the tests and exercises.	NI	No evidence of deviations because of the context.	NA		NA		PN	No information regarding how to deal with the missing data.	PN	probabely not as the dropped out rate is low: 4%.	Some concerns	Some concerns				PY	only 4% dropped out.	NA		NA		NA		Low
2022/12/08 18.33	Engel 2019	YONG			HIIT	wait list control	muscular strength	standing long jump	assignment to intervention (the 'intention-to-treat' effect)	NA	1	Journal article(s)	NI	NI	They said randomised only, no further information. Allocation taken place until all the participants enrolled.	PY	No baseline difference	Some concerns	Some concerns				PY	PY	probably aware as they are doing different exercises.	NI	no evidence of deviation based on the context.	NA		NA		PY	No dropped out participants and two way ANOVA is considered proper way for analysis.	NA		Some concerns	Some concerns				Y	all completed.	NA		NA		NA		Low
[truncated: 35 more columns]
